## **The role of behavioural flexibility in primate diversification**

Maria J.A. Creighton<sup>a</sup>, Dan A. Greenberg<sup>b</sup>, Simon M. Reader<sup>a</sup> & Arne Ø. Mooers<sup>b</sup>

<sup>a</sup>Department of Biology, McGill University, Montreal, Quebec, Canada

<sup>b</sup>Department of Biological Sciences, Simon Fraser University, Burnaby, British Columbia, Canada

\*Author for correspondence: [maria.creighton@mail.mcgill.ca](mailto:maria.creighton@mail.mcgill.ca); ph: +1-514 398 7020; McGill University, Stewart Biology Building 1205 ave Docteur Penfield, Montreal, QC Canada, H3A 1B1 ORCID:

<https://orcid.org/0000-0003-1337-1946>

DECLARATIONS OF INTEREST: None

1 ABSTRACT:

2 Understanding impacts on species diversification is fundamental to our understanding of the  
3 evolutionary processes underlying biodiversity. The ‘behavioural drive hypothesis’ posits that  
4 behavioural innovation, coupled with the social transmission of innovative behaviours, can  
5 increase rates of evolution and diversification, as novel behaviours expose individuals to new  
6 selection regimes. We test this hypothesis within the primates, a taxonomic group with  
7 considerable among-lineage variation in both species diversity and behavioural flexibility. We  
8 employ a time cut-off in our phylogeny to help account for biases associated with recent  
9 taxonomic reclassifications and compare three alternative measures of diversification rate that  
10 consider different phylogenetic depths. We find that the presence of behavioural innovation and  
11 social learning are positively correlated with diversification rates among primate genera, but not  
12 at shallower taxonomic depths. Given that we find stronger associations when examining older  
13 as opposed to newer diversification events even after controlling for potential sampling biases,  
14 we suggest that extinction resistance may be an important mechanism linking behavioural  
15 flexibility and diversification in primates. If true, our findings offer support for an expanded  
16 view of the behavioural drive hypothesis, and key predictions of this hypothesis can be tested as  
17 primates are forced to respond to ongoing environmental change.

18

19 **KEYWORDS:** behavioural drive; behavioural flexibility; evolutionary diversification; primates;  
20 speciation

21

22 Extant species diversity is remarkably variable across the Tree of Life (Willis, 1922; Williams,  
23 1964). For clades of the same age, differences in net diversification rate (i.e. speciation rate

24 minus extinction rate) ultimately drive differences in clade size. Both the external environment  
25 (e.g. Badgley, 2010; Kozak & Wiens, 2010; Frey, 2010) and intrinsic features of a lineage (e.g.  
26 Raikow, 1986; Heard & Hauser, 1995) can influence net diversification. Despite ongoing study,  
27 there remains considerable debate over the factors that lead to differences in diversification rate  
28 among lineages, and their relative importance (e.g. Lewontin, 1983; West-Eberhard, 1989; Isaac,  
29 et al., 2005; Rabosky, 2009; see review by Wiens, 2017).

30

31 Plasticity has been repeatedly proposed to play a major role in shaping evolutionary trajectories  
32 in general, and speciation in particular (Baldwin, 1902; Lewontin, 1983; Bateson, 1988; Wcislo,  
33 1989; Odling-Smee, et al., 2003; West-Eberhard, 2003; Pelletier, et al., 2009), and theoretical  
34 modelling supports its potential influence (e.g. Hinton & Nowlan, 1987; Anderson, 1995; Behera  
35 & Nanjundiah, 1995; Ancel, 1999; 2000). Behavioural development and expression often allow  
36 for more rapid responses than other forms of plasticity such as induced morphological changes  
37 (Duckworth, 2009; Snell-Rood, 2013; West-Eberhard, 2003). Thus, behaviour in particular has  
38 been hypothesized to influence evolutionary rates, particularly lineage diversification (Wyles, et  
39 al., 1983; Wilson, 1985; West-Eberhard, 2003). Notably, the ‘behavioural drive hypothesis’  
40 posits that behavioural innovation, coupled with social transmission, increases rates of  
41 evolutionary diversification as populations that adopt novel behaviours are exposed to new  
42 selective regimes and eventually diverge from their ancestral lineage (Wyles, et al., 1983;  
43 Wilson, 1985). Thus, behaviourally flexible taxa (i.e. those taxa exhibiting high propensities for  
44 behavioural change due to, for example, learning or readiness to transition to new conditions (Sol  
45 & Lefebvre, 2000; Audet & Lefebvre, 2017)) are predicted to show faster rates of evolutionary  
46 change, and eventual evolutionary diversification, compared to less flexible taxa (Sol, et al.,

47 2005). However, despite theoretical support (e.g. Price, et al., 2003; Lachlan & Servedio, 2004;  
48 Lapiedra, et al., 2013), the behavioural drive hypothesis remains contested. Some dispute the  
49 extent to which behaviour plays any active role in animal evolution (e.g. Scott-Phillips, et al.,  
50 2014) while others suggest that behavioural flexibility is more likely to inhibit than enhance  
51 species diversification: populations that can utilize new resources or transition to new  
52 environments are shielding their genomes from bouts of strong directional selection, a hypothesis  
53 termed ‘behavioural inhibition’ (Huey, et al., 2003; Duckworth, 2009). These conflicting views  
54 make it clear that relationships between behavioural flexibility and diversification across taxa  
55 have yet to be fully elucidated.

56

57 In this context of opposing views, Duckworth (2009) suggests that behavioural drive and  
58 behavioural inhibition can both play a role in shaping evolutionary processes. Under this  
59 proposed framework behavioural inhibition acts on short time scales to buffer abrupt  
60 environmental changes that may otherwise result in a population bottleneck or strong bouts of  
61 directional selection. Over longer timescales, the same behavioural shift can also initiate  
62 behavioural drive, either by setting the stage for allopatric speciation or by exposing the newly  
63 situated population to novel selection regimes (Huey, et al., 2003; Losos, et al., 2004;  
64 Duckworth, 2009; see example in Muñoz & Losos, 2018).

65

66 Previous studies have provided support for both behavioural drive (e.g. Yeh, 2004; Yeh & Price,  
67 2004; Tebbich, et al., 2010, Riesch, et al., 2012; Foote, et al., 2016) and behavioural inhibition  
68 (e.g. Losos, et al., 2004; Weber, et al., 2004; Shultz, et al., 2005; Gonzalez-Voyer, et al., 2016).

69 However, many of these studies have primarily considered the effects of behavioural flexibility  
70 on micro-evolutionary change at short time scales (e.g. recent speciation events or population  
71 decline). Three comparative studies have tested for the macro-evolutionary effects of behavioural  
72 flexibility on lineage diversification across multiple lineages, all in birds (Nicolakakis, et al.,  
73 2003; Sol, et al., 2005 – also see Sol, 2003; Sayol, et al., 2019). These studies have employed  
74 two proposed correlates of behavioural flexibility: brain size relative to body size (a structural  
75 measure presumed and shown elsewhere to be associated with behavioural flexibility; e.g.  
76 Lefebvre, et al., 2004) and innovation rate (a behavioural measure) taken from literature surveys.  
77 Both large relative brain size and high innovation rates were associated with heightened  
78 diversification in birds (Nicolakakis, et al., 2003; Sol, et al., 2005; Sayol, et al., 2019), consistent  
79 with the behavioural drive hypothesis. However, such tests have yet to be applied across other  
80 taxa, making it difficult to generalize the role of behaviour in shaping the Tree of Life.

81

82 Here, we explore the relationship between four proxies of behavioural flexibility and several  
83 measures of diversification rate (see Methods) in the Primates, a taxonomic group with  
84 considerable among-lineage variation in several measures of behavioural flexibility (Reader &  
85 Laland, 2002; Reader, et al., 2011) and extant species diversity (Upham, et al., 2019a; 2019b).  
86 Variables associated with diversity of other taxa (e.g. geographic range size and latitude) have  
87 been shown to be poor predictors of primate diversification (Arbour & Santana, 2017; Upham, et  
88 al., 2019a), leaving a great deal of what shapes extant primate diversity unexplained. We focus  
89 on two behavioural measures of behavioural flexibility, the presence or absence of published  
90 reports of innovation and of social learning, and two brain size measures widely thought to be  
91 associated with ability to exhibit flexible behaviours. We predict that our separate measures of

92 behavioural flexibility will covary positively with diversification rates across primate lineages.  
93 To examine how this association changes at different evolutionary timescales, we examine how  
94 behavioural flexibility correlates with diversification over both shallow and deeper time depths  
95 in our phylogeny. Understanding how behaviour and ecology may interact to shape evolutionary  
96 patterns provides a glimpse into some of the processes that have shaped the past, and may in turn  
97 dictate the future biological diversity among primates.

98

99 **METHODS:**

#### 100 ***Rationale***

101 Innovation and social learning are both important for behavioural drive because multiple  
102 individuals must acquire an innovation by social learning or independent innovation to have  
103 population-level effects (Wyles, et al., 1983; Wilson, 1985; Duckworth, 2009). In addition to  
104 facilitating the transmission of innovations throughout a population, social learning can also be a  
105 valuable measure of population-level behavioural flexibility on its own as it reflects the ability of  
106 individuals within a population to pick up behaviours that are novel to them but not necessarily  
107 novel to the population. We note that social learning and innovation are taxonomically  
108 widespread (Reader & Biro, 2010; Snell-Rood, et al., 2015). However, we assume that species  
109 with no published accounts of social learning or innovation are likely relying on these behaviours  
110 infrequently. Moreover, the innovation and social learning data used here have been positively  
111 associated with other measures of behavioural flexibility (Reader, et al., 2011; Navarrete, et al.,  
112 2016). For innovation, we focus on technical innovations (classified as those involving tool use  
113 following Navarrete, et al., 2016) because these more easily defined behaviours have been linked

114 to complex cognition (Overington, et al., 2009), and reports of other classes of innovation (e.g.  
115 food type innovation) can be highly influenced by opportunistic events (Ducatez, et al., 2015).  
116 Combined with the fact that taxa with reports of technical innovation also tended to be those with  
117 evidence of other innovation types (see data in Navarrete, et al., 2016), this likely makes  
118 technical innovation a robust estimate of innovativeness across primates.

119

120 Literature-based evidence for behavioural flexibility across taxa has its limitations and so we  
121 chose to also consider structural correlates of behavioural flexibility. It is widely thought that  
122 particular brain regions are associated with flexible behaviour – particularly the neocortex (see  
123 e.g. Keverne, et al., 1996; Mikhalevich, et al., 2017) and cerebellum (Vandervert, 2003;  
124 Vandervert, et al., 2007; Barton, 2012). Therefore, in addition to total brain size (relative to body  
125 mass), we considered the sum of neocortical and cerebellar volumes relative to rest of total brain  
126 volume as another proxy for behavioural flexibility. We note that while brains perform many  
127 functions and the link between volume and function is not well established (e.g. Healy & Rowe,  
128 2007; Logan, et al., 2018), behavioural flexibility measures such as innovation rate, social  
129 learning rate and learning performance in the laboratory do correlate with brain volume measures  
130 across species (Reader, 2003; Lefebvre, et al., 2004; Reader, et al., 2011). This suggests that  
131 primate brain volume measures are useful secondary proxies of behavioural flexibility. While  
132 direct measures of behavioural flexibility under standardized testing conditions would be  
133 valuable, such measures are not available for the large-scale comparative tests we conduct here.  
134 We can however compare the consistency of results across different proxies for behavioural  
135 flexibility.

136

137 Diversification rate (our dependent variable) is not straightforward to measure. In particular, the  
138 influence of taxonomic reclassifications, namely those associated with the introduction of the  
139 ‘phylogenetic species concept’ (PSC) can lead to biased species designations across taxa  
140 (Tattersall, 2007; Rylands & Mittermeier, 2014), particularly through the elevation of subspecies  
141 to the full species rank. Taxonomically-biased species designations will in turn bias  
142 diversification metrics such as the number of species in a taxon divided by its age. We attempt to  
143 minimize such taxonomic biases in order to produce a consistent measure of diversification rate  
144 across taxa by including a time cut-off in our phylogeny (see next section), a method that might  
145 be useful for future studies of species diversification.

146

## 147 ***Data***

### 148 *Diversification Rate*

149 Estimating diversification rates is challenging because it depends on an accurate assessment of  
150 both the taxonomic richness and divergence time of a given lineage. A previous study testing the  
151 effect of behavioural drive at shallow time depths used subspecies per species as a measure of  
152 subspecific diversification (Sol, et al., 2005); in primates taxonomic richness has changed  
153 drastically over recent decades (Tattersall, 2007; Groves, 2014), with much of this change  
154 attributed to application of the ‘phylogenetic species concept’ (PSC) and its tendency to raise  
155 former subspecies and variants to the full species rank (Tattersall, 2007). Importantly, it has been  
156 suggested that these elevations in subspecies status have been biased toward certain taxa (Isaac,  
157 et al., 2004), which would lead to inconsistent estimates of species versus subspecies richness  
158 across lineages. Studies using other estimates of primate diversification (i.e. diversification



159 analyses using TreePar; Stadler, 2011) have been hindered by the applications of the PSC,  
160 particularly when it comes to accurately estimating shallow divergences (Springer, et al., 2012).  
161 Modern primate phylogenies are also not reflective of modern primate taxonomies, including  
162 some phylogenetic species and omitting others, preventing us from using recently described  
163 evolutionary rate measures that rely on a comprehensive phylogeny with consistent species  
164 estimates among clades. Instead, we used well-resolved “lineages” that putatively reflect stable  
165 species complexes. We started with the most widely used, dated primate tree publically available  
166 at the time of this study, the GenBank taxonomy consensus tree provided on the 10kTrees  
167 website (version 3) (Arnold, et al., 2010), containing 301 tips. We then created a time cut-off in  
168 the tree at the time when we determined a majority of robust biological species described in  
169 Honacki et al. (1982) had evolved (1.1mya), subsequently eliminating shallower divergences  
170 after this time cut-off from the consensus tree (see Figure S1). Honacki et al. (1982) is the last  
171 major primate taxonomy published before the introduction of the PSC (Cracraft, 1983). Each  
172 branch in the tree that was extant 1.1mya we designated a "lineage." We also eliminated species  
173 no longer recognized by modern taxonomies (IUCN/SSC Primate Specialist Group, 2018). This  
174 resulted in 241 identifiable lineages to compare in terms of taxonomic richness and divergence  
175 times. Using the most recent published primate species and subspecies list from the IUCN/SSC  
176 Primate Specialist Group (2018), we referenced taxonomic and phylogenetic works to assign  
177 each of the 705 species and subspecies to one of these 241 lineages. This allowed us to assign an  
178 agnostic “taxon richness” score to each lineage (see Figure S1) that accounts for the  
179 discrepancies in subspecies elevations across lineages. Because higher level classifications have  
180 also been affected by taxonomic changes, each species or subspecies listed by the IUCN/SSC  
181 Primate Specialist Group (2018) was also assigned to one of the 66 genera named in our

182 10kTrees phylogeny (Arnold, et al., 2010). After eliminating two species and one genus in our  
183 tree that could not be resolved using these methods (see electronic supplementary materials), our  
184 study considered 703 taxa (species or subspecies) assigned to 239 lineages and 65 genera.

185

186 To estimate lineage diversification rate, the natural log of “taxon richness” for each lineage in  
187 our tree was divided by the stem age of that lineage using the method-of-moments approach  
188 described in Magallon & Sanderson (2001) to produce a ‘Taxa per Lineage Diversification Rate’  
189 that should be unbiased by recent subspecies elevations. This method was repeated at the genus  
190 level where the natural log of “taxon richness” for each genus was divided by the stem age of  
191 that genus (hereafter ‘Taxa per Genus Diversification Rate’). Lastly, we created a second, and  
192 perhaps more conservative estimate of genus diversification where richness scores were  
193 generated using the number of lineages per genus, rather than the number of taxa described by  
194 the IUCN/SSC Primate Specialist Group (2018), hereafter ‘Lineage per Genus Diversification  
195 Rate’. We found that there were several instances of non-monophyletic genera within the  
196 phylogeny (*Galagoides*, *Otolemur*, *Galago* and *Euoticus*). As such, we elected to retain these  
197 lineages in our lineage-level tree (as their unresolved nature may simply be due to taxonomic  
198 issues; Masters, et al., 2017), but removed these genera from genus-level analysis as it is unclear  
199 how to assign a stem age to these clades. We additionally removed the genus *Semnopithecus*,  
200 which comprised a single lineage nested within the genus *Trachypithecus*. Thus, while our  
201 lineage-level dataset contained lineages from 65 genera, our genus-level analysis considered only  
202 60 genera. Lineages of *Cercopithecus* were also resolved as polyphyletic in the phylogeny, with  
203 a small fraction of lineages forming a clade sister to *Erythrocebus*. Since a majority of  
204 *Cercopithecus* lineages were resolved as monophyletic, we opted to assign *Cercopithecus* the

205 divergence date that separates it from the clade of *Chlorocebus* and *Erythrocebus*; we note that  
206 removing *Cercopithecus* in its entirety did not qualitatively change the results we report here.  
207 We illustrate these methods and present associated calculations using genus *Aotus* as an example  
208 in the electronic supplementary materials.

209

### 210 *Structural Proxies of Behavioural Flexibility*

211 Lineage-level estimates for all brain measures were calculated by taking the geometric mean of  
212 taxon volumes for each lineage. Genus-level estimates were calculated by subsequently taking  
213 the geometric mean of these lineage estimates for each genus.

214

215 Using lineage-level estimates, we regressed logarithmic endocranial volume in  $\text{cm}^3$  (ECV)  
216 (Powell, et al., 2017) (hereafter ‘brain volume’) as a function of logarithmic body mass (Jones, et  
217 al., 2009) and retained the residuals (Dunbar & Schultz, 2007). These residuals (hereafter  
218 ‘relative brain volume’) were repeated using genus-level estimates and were used in subsequent  
219 analyses to test the association between brain volume relative to body mass and diversification  
220 rate at both the lineage and genus-level (Lefebvre, et al., 1997; Sol, et al., 2005). Residual  
221 analyses may lead to an inflation of type II error as it is a very conservative method of  
222 controlling for body size (Darlington & Smulders, 2001), however, including both variables in a  
223 multiple regression as suggested by some (e.g. Freckleton, 2002) caused brain volume and body  
224 mass to compete within our models (results not shown), seemingly inflating resulting effect  
225 sizes. As a result, we chose to use the more conservative approach based on residual brain  
226 volume.

227

228 Data for neocortex, cerebellum and rest-of-brain volume were obtained from Navarrete et al.  
229 (2018) and the compilation in DeCasien & Highman (2019). The DeCasien & Highman (2019)  
230 compilation includes data from the prior Reader & Macdonald (2003) compilation and contains  
231 brain component volumes from multiple studies, largely Stephan et al. 1970, 1981, and 1988 (see  
232 electronic supplementary materials). Absolute neocortex and cerebellum volumes covary with  
233 total brain volume and so we again used lineage-level brain estimates and took residuals from a  
234 log-log regression of the combined neocortex and cerebellum volumes on the rest-of-brain  
235 volumes (i.e. total brain volume minus neocortex and cerebellum volumes). These residuals  
236 (hereafter ‘relative neocortex and cerebellum volume’) were repeated using genus-level brain  
237 estimates and used to test the relationship between neocortex and cerebellum volume and  
238 diversification rate at both the lineage and genus-level.

239

#### 240 *Behavioural Proxies of Behavioural Flexibility*

241 Counts of innovation and social learning per lineage came from Reader et al. (2011) and  
242 Navarrete et al. (2016). Reader et al. (2011) established this dataset through a survey of over  
243 4000 published articles for examples of social learning and behavioural innovation. Reader et al.  
244 (2011, p. 1018) define an innovation as the tendency to “discover novel solutions to  
245 environmental or social problems”. These data were later subdivided into different innovation  
246 categories by Navarrete et al. (2016), including ‘technical’ innovations, defined as innovations  
247 involving tool use. Reader et al. (2011, p. 1018) define social learning as the tendency to “learn  
248 skills and acquire information from others”, including instances of social learning from both kin

249 and unrelated individuals. Social learning was often inferred from observational data in the  
250 original reports. Experimental data would be preferred (Reader & Biro, 2010) but are not  
251 available for the wide taxonomic spread of our study. The innovation and social learning counts  
252 provide quantitative comparative data for a large number of species, typically from observations  
253 in the wild. Despite acknowledged weaknesses of such observational data (discussed in  
254 Lefebvre, et al., 1997; Laland & Reader, 1999; Reader, 2003; Reader & MacDonald, 2003;  
255 Reader, et al., 2011), the taxonomic spread allows for tests of large-scale macro-evolutionary  
256 trends that can then be followed up by targeted experimental approaches.

257

258 As an alternative to treating behavioural data as a binary metric (e.g. innovativeness in Ducatez,  
259 et al., 2020), other studies have used “rate” measures of behaviours: residuals from a log-log plot  
260 of the total number of recorded instances of a behaviour (e.g. social learning) and an estimate of  
261 research effort (e.g. the number of papers published on that taxa; e.g. Sol, et al., 2005; Reader, et  
262 al., 2011; Navarrete, et al., 2016; Ducatez, et al., 2020). However, we opted to use binary  
263 measures, allowing us to use data imputation methods to minimize any biases caused by under-  
264 studied taxa, to statistically account for potential biases associated with summarizing behavioural  
265 data at higher taxonomic levels, and to run simulations to address the assumptions underlying  
266 our analyses. We therefore assigned each lineage or genus binary scores of 1 (presence of  
267 innovation or social learning) or 0 (absence of innovation or social learning). As a test, we fit a  
268 log-log Model I regression of both technical innovation and social learning on research effort as  
269 reported for species by Reader et al. (2011) and retained the residuals, and plotted these residuals  
270 against the presence (1) and absence (0) of these behaviours; as expected, the binary measure  
271 captured rate measures well (Figures S2 and S3). Correlation coefficients for predictor variables

272 can be found in the electronic supplementary material (Table S1) along with reports of  
273 phylogenetic patterns observed among predictor and response variables (Table S2).

274

#### 275 *Genus-level Simulations*

276 We scored each lineage as exhibiting technical innovation or social learning if there was any  
277 positive evidence for such a behaviour across the tips, thus assuming the behaviour was  
278 ancestrally present in the lineage rather than derived only in the taxon or taxa where it was  
279 observed. However, scoring genera as exhibiting flexible behaviour if recorded in any of its  
280 lineages could lead to a statistical bias if more lineage-rich genera (which will generally have  
281 higher diversification rates) are more likely by chance to include at least one lineage that  
282 expresses technical innovation or social learning. Fortunately, it is straightforward to simulate  
283 the evolution of these traits on our tree independently of diversification rate to quantify this  
284 sampling effect, and to ask if any observed correlations depart from this expectation. We  
285 simulated the evolution of lineage-specific technical innovation and social learning on the  
286 phylogeny over 500 iterations using the symmetrical rate Mk model of discrete trait evolution  
287 (Lewis, 2001; Harmon, et al., 2008), parameterized with the observed transition rates from our  
288 lineage dataset. We included imputed data for estimating transition rates, noting that removal of  
289 these points did not meaningfully influence transition rates. After simulating the evolution of  
290 these traits 500 times, we repeated genus-level analyses over the resulting datasets. We present  
291 results from the relevant null model simulations in the electronic supplementary materials and  
292 report the probabilities of obtaining the observed effect sizes by chance (the proportion of null-  
293 generated effect sizes that exceeded the observed effect size in these 500 simulations) to test  
294 whether our observed effect sizes could be explained by this potential sampling bias.

295

## 296 *Analysis*

### 297 *Trait Imputation*

298 While we collected data for brain size, body mass, and behavioural flexibility from the most  
299 comprehensive datasets and compilations available, research biases and the persistent  
300 reassessment of primate taxonomy has resulted in inconsistent data coverage across lineages, and  
301 there were still many lineages that were missing data (see Figure S4). To maximize our  
302 evolutionary inferences on diversification and allow for the inclusion of data-poor lineages, we  
303 chose to impute missing predictor variables using phylogenetic imputation methods (see  
304 electronic supplementary materials for details and reports of predictive accuracy from model  
305 cross-validation; Table S3). Data on relative neocortex and cerebellum volume were sparse and  
306 unevenly distributed across the phylogeny (82.4% of lineages missing data; Table S3), making it  
307 infeasible to reliably impute missing values. We thus only ran models of relative neocortex and  
308 cerebellum volume on the original, non-imputed dataset. All of the regressions we report below  
309 were repeated for the original, non-imputed datasets (see Results and the electronic  
310 supplementary material Tables S4, S5 and S6) and except as noted below gave a similar pattern  
311 of results.

312

### 313 *Predictors of diversification*

314 To assess the relationship between our measures of behavioural flexibility and diversification  
315 rate at the lineage-level (Taxa per Lineage Diversification Rate) we used phylogenetic  
316 generalized least squares (PGLS) regressions with the 10kTrees consensus tree including our 239

317 defined lineages. PGLS is a common regression method used to investigate evolutionary  
318 associations while accounting for the fact that closely-related lineages tend to be similar (e.g. in  
319 body size, life history and ecology; see Freckleton & Harvey, 2002). Continuous data (relative  
320 brain volume and relative neocortex and cerebellum volume) were  $\log_e$ -transformed and scaled  
321 by 2 standard deviations in all models for both the lineage and genus-level analyses (Gelman,  
322 2008). After imputing missing values, our dataset contained 52 lineages scored as having  
323 evidence of social learning (scored as 1) and 28 lineages scored as having evidence of technical  
324 innovation (scored as 1). Wyles et al. (1983) predicted accelerated evolution in species with a  
325 dual capacity for innovation and social propagation of new behaviours, therefore, we also tested  
326 a combined measure of technical innovation and social learning. In this combined measure  
327 lineages with the presence of both behaviours were scored as 1 (n=25), and those exhibiting only  
328 one or neither behaviour were scored as 0 (n=214).

329

330 To assess the relationship between our measures of behavioural flexibility and diversification  
331 rate deeper in the tree we repeated the same analysis at the genus-level using two different  
332 estimates of diversification rate: Taxa per Genus Diversification Rate and Lineage per Genus  
333 Diversification Rate. Lineage per Genus Diversification Rate could be considered a conservative  
334 estimate that omits shallower divergences. After imputing missing values, our dataset of 60  
335 genera contained 21 genera scored as having evidence of social learning, 9 genera scored as  
336 having evidence of technical innovation and 8 genera with evidence of both behaviours.

337



338 Body mass and attendant life history traits have been predicted to impact diversification rates in  
339 some taxa with conflicting results (e.g. Cardillo, et al., 2003; Paradis, 2005; Fontanillas, et al.,  
340 2007; Thomas, et al., 2010), and body mass is closely correlated with many primate life history  
341 traits (e.g. age at first reproduction, maximum lifespan; Charnov & Berrigan, 1993; Purvis, et al.,  
342 2003; Street, et al., 2017). To examine further whether our results could stem from confounding  
343 effects of body mass and its correlates, we ran PGLS analyses to test body mass as an  
344 independent predictor of our diversification rate measures. Results from these tests were non-  
345 significant across all measures of diversification (see electronic supplementary material Tables  
346 S4 to S6). All analyses used R version 3.6.3 (R Core Team, 2020).

347

## 348 RESULTS:

### 349 *Lineage-level predictors of diversification*

350 We found either weak or no support for the behavioural drive hypothesis when testing our  
351 measures of behavioural flexibility at the lineage level (results summarized in Figures 1 and S6;  
352 Table S4). Social learning had the strongest association with Taxa per Lineage Diversification  
353 Rate, whereby primate lineages exhibiting social learning had faster mean diversification rates  
354 ( $0.319 \text{ species my}^{-1}$ ) than non-social learning lineages, but this did not reach statistical  
355 significance ( $0.228 \text{ species my}^{-1}$ ;  $\beta$  [95% CI] =  $0.091$  [-0.006-0.188];  $p = 0.066$ ). Technical  
356 innovation ( $p = 0.792$ ), the combined presence of technical innovation and social learning ( $p =$   
357  $0.741$ ), relative brain volume ( $p = 0.215$ ), relative neocortex and cerebellum volume ( $p = 0.664$ ),  
358 and body mass ( $p = 0.764$ ; Table S4) did not exhibit noteworthy associations with Taxa per  
359 Lineage Diversification Rate in either direction.

360

361 *Genus-level predictors of diversification*

362 Technical innovation ( $p= 0.577$ ), social learning ( $p= 0.442$ ), the combined presence of technical  
363 innovation and social learning ( $p= 0.411$ ), relative brain volume ( $p= 0.058$ ), relative neocortex  
364 and cerebellum volume ( $p= 0.987$ ), and body mass ( $p= 0.204$ ) did not exhibit noteworthy  
365 associations with Taxa per Genus Diversification Rate (Figures 1 and S6; Table S5). Patterns  
366 were similar using the non-imputed dataset (Table S5), though there was a significant positive  
367 relation between relative brain volume and Taxa per Genus Diversification Rate ( $p= 0.004$ ).  
368 Although the non-imputed data may suffer from sampling biases, it shows similar patterns  
369 overall, and the relationship between relative brain volume and Taxa per Genus Diversification  
370 Rate becomes much stronger.

371

372 In contrast to the other diversification measures, Lineage per Genus Diversification Rate was  
373 positively associated with all three behavioural measures of behavioural flexibility (results  
374 summarized in Figures 1 and S6; Table S6). Genera with records of technical innovation were  
375 shown to have a faster mean Lineage per Genus Diversification Rate ( $0.136 \text{ lineages my}^{-1}$ ) than  
376 those with no reports ( $0.070 \text{ lineages my}^{-1}$ ;  $\beta$  [95% CI] =  $0.066$  [ $0.002$ - $0.130$ ];  $p= 0.048$ ). Genera  
377 with records of social learning similarly exhibited a faster mean Lineage per Genus  
378 Diversification Rate ( $0.137 \text{ lineages my}^{-1}$ ) than those which had no reports of social learning  
379 ( $0.049 \text{ lineages my}^{-1}$ ;  $\beta$  [95% CI] =  $0.088$  [ $0.043$ - $0.132$ ];  $p < 0.001$ ). Finally, genera with reports  
380 of both technical innovation and social learning exhibited a faster mean Lineage per Genus  
381 Diversification Rate ( $0.153 \text{ lineages my}^{-1}$ ) compared to those with evidence for only one or

382 neither behaviour ( $0.068 \text{ lineages my}^{-1}$ ;  $\beta$  [95% CI] =  $0.085$  [ $0.018$ - $0.151$ ];  $p= 0.015$ ). However,  
383 relative brain volume ( $p= 0.253$ ), relative neocortex and cerebellum volume ( $p= 0.684$ ) and body  
384 mass ( $p= 0.268$ ) did not share notable associations with Lineage per Genus Diversification Rate  
385 (Figures 1 and S6; Table S6).

386

### 387 *Genus-level Simulations*

388 These observed positive correlations between our measures of behavioural flexibility and genus-  
389 level estimates of diversification rate could arise from chance: with more lineages there is a  
390 higher probability that a propensity to innovate or to socially learn may arise and be  
391 subsequently conferred to the entire genus. To account for this, we simulated the random  
392 evolution of the presence of social learning and technical innovation across the primate  
393 phylogeny using a symmetrical Mk model and observed transition rates. We found that indeed  
394 there is a bias towards a positive relationship between diversification rate and the presence of  
395 each behavioural flexibility measure (supplementary Figures S7 to S9); however, our results for  
396 Taxa per Genus Diversification Rate remained non-significant and for Lineage per Genus  
397 Diversification Rate remained significant after adjusting for our expected effect sizes. For Taxa  
398 per Genus Diversification Rate, the probabilities of the observed effect sizes ( $\beta$ ) occurring by  
399 chance were  $p=0.392$  for presence of technical innovation,  $p=0.420$  for presence of social  
400 learning, and  $p=0.260$  for combined presence of technical innovation and social learning. For  
401 Lineage per Genus Diversification Rate, the probabilities of the observed effect sizes ( $\beta$ )  
402 occurring by chance were  $p=0.028$  for presence of technical innovation,  $p=0.002$  for presence of  
403 social learning, and  $p=0.008$  for combined presence of technical innovation and social learning.

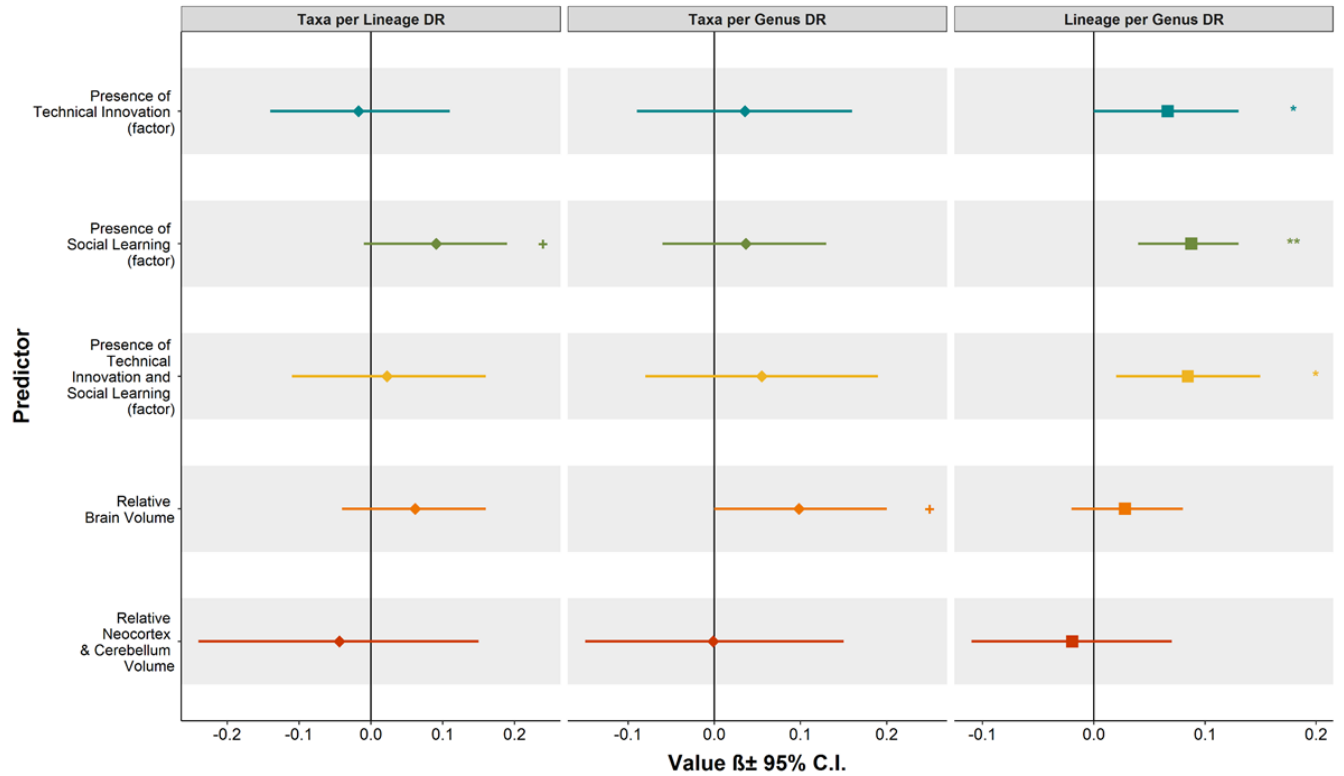

404

405 Figure 1: Results from PGLS analyses showing the association of proxies of behavioural  
 406 flexibility with Taxa per Lineage Diversification Rate (DR), Taxa per Genus Diversification  
 407 Rate and Lineage per Genus Diversification Rate across primates. 95% confidence intervals are  
 408 represented by horizontal lines around the associated value. Diamonds indicate diversification  
 409 rates estimated with species/subspecies richness, and squares indicate diversification rates  
 410 estimated with lineage richness. Results presented include imputed data when available and brain  
 411 measures were standardized ( $\ln x/(2sd)$ ). Significance indicated as: + $P \leq 0.1$ ; \*  $P < 0.05$ ; \*\*  $P < 0.01$ .

412 DISCUSSION:

413 We examined how behavioural flexibility correlates with primate diversification over both  
414 shallow and deeper time depths in our phylogeny using three diversification measures. We find  
415 little to no compelling support for an association between our proxy measures of behavioural  
416 flexibility and diversification at shallow depths, but do find evidence for a positive association  
417 when looking at older primate lineages: Lineage per Genus Diversification Rate was on average  
418 higher in taxa with reports of innovation, social learning, and innovation and social learning  
419 together compared to other taxa. This pattern could suggest a nuanced effect of behaviour on  
420 diversification that differs from the original formulation of the behavioural drive hypothesis.  
421

422 One benefit of our study design is that it allowed us to consider taxa that are commonly  
423 overlooked (i.e. subspecies and species omitted from higher-order phylogenies), many of which  
424 likely represent shallow splitting events. The weak associations with behavioural flexibility that  
425 we observed at shallower time-scales could be explained in several ways. On one hand, this  
426 pattern could be reflective of biases in describing taxa (species and subspecies) among groups.  
427 While our time cut-off and our use of both species and subspecies mitigates against biases  
428 associated with the elevation of subspecies under the PSC, if less flexible species are more likely  
429 to have a larger number of taxa described overall, this could obscure underlying biological  
430 patterns. In this case, the lineages per genus results are less biased. If this is the case, then  
431 behavioural flexibility may enhance diversification overall as proposed by Wilson et al. (Wyles,  
432 et al., 1983; Wilson, 1985), and we observe stronger associations when ignoring shallow splits.  
433 On the other hand, if we take our results at face value, the pattern of stronger associations at

434 deeper levels could indicate that time plays an even larger role in the relationship between  
435 behavioural flexibility and diversification than previously suggested by Duckworth (2009).  
436  
437 Under Mayr's 'ephemeral speciation model' (Mayr, 1963; Rosenblum, et al., 2012) and the  
438 related 'ephemeral divergence hypothesis' (Futuyma, 1979; 2010), divergence can occur rapidly  
439 and often, but many newly diversifying lineages do not persist, instead being eradicated via  
440 extinction or 'reabsorption' by hybridization (see, e.g., Rosenblum, et al., 2012). It is possible  
441 that a number of the described species and subspecies used here (IUCN/SSC Primate Specialist  
442 Group, 2018) represent such ephemeral diversification events, especially considering that the  
443 PSC has facilitated the splitting of very closely related populations. If so, our results could be  
444 explained if behavioural flexibility is buffering against extinction of recently diverged species  
445 through behavioural shifts, thereby influencing lineage persistence rather than rate of splitting,  
446 leading to a stronger relationship when comparing the accumulation of lineages deeper in the  
447 tree. This would be complementary to findings from Arbour & Santana (2017), who show that  
448 decreased extinction preceded a shift to increased evolutionary rates in the most speciose primate  
449 family (Cercopithecidae), along with evidence suggesting behavioural flexibility is beneficial for  
450 population persistence in birds (e.g. Shultz, et al., 2005; Rossmannith, et al., 2006; Sol, et al.,  
451 2007, Ducatez, et al., 2020). Whether behavioural flexibility does act to reduce extinction in  
452 primates may be revealed going forward as biodiversity loss unfolds. Under this scenario, even  
453 under the assumption that these behaviours are ancestral to genera, the positive associations we  
454 find seem unlikely to support behavioural flexibility promoting diversification as per the  
455 behavioural drive hypothesis: behavioural flexibility does not seem to be driving recent, shallow  
456 divergences in primates. This contrasts to evidence found in birds (Nicolakakis, et al., 2003; Sol,

457 et al., 2005; Sayol, et al., 2019) and suggests that either there is no generalizable relationship  
458 between behaviour and lineage diversification, or that we need to focus on extinction rather than  
459 speciation to understand the macro-evolutionary effects of behavioural flexibility in primates.

460

461 One avenue to help determine why we observe stronger associations deeper in the tree would be  
462 to compare genetic variation in flexible versus inflexible lineages. We predict that if behavioural  
463 flexibility leads to faster diversification through faster rates of divergence, then unsupervised  
464 genetic clustering of species and subspecies gene sequences should find more distinct clusters,  
465 relative to time, in flexible versus inflexible lineages. If this is not the case, such that genetic  
466 sampling does not reveal increased divergence relative to time in flexible groups, this would  
467 provide additional support for behavioural flexibility dampening extinction.

468

469 One notable limitation of our study is that one measure thought to be associated with behavioural  
470 flexibility – neocortex and cerebellum volume – had very little data available for lineages  
471 reported as inflexible (e.g. among lemurs, tarsiers, titis and sakis), partly because we required  
472 measurements of neocortex, cerebellum and total brain volume to be for the same specimen.  
473 More data are needed to fully test these measures as drivers of diversification. Our study is also  
474 limited by lineages and relationships present in our phylogeny (Arnold, et al., 2010). Available  
475 primate phylogenies, (e.g. Arnold, et al., 2010; Upham, et al., 2019b) do not reflect the most  
476 recent taxon lists. The tips available in our phylogeny prevented us from using diversification  
477 rate estimates that require a fully-resolved tree (e.g. the DR measure from Jetz, et al., 2012)  
478 and/or that incorporate extinct lineages (e.g. Mitchell & Rabosky, 2017). However, we suggest  
479 that our method for measuring diversification rate could be applied more broadly across studies

480 of species diversification as it presents a solution to the common problem of species definitions,  
481 allows for the consideration of recent splitting events, and can be applied in taxa where available  
482 phylogenies lack the appropriate tree tips for alternative diversification rate metrics.

483

484 While our results are consistent with the hypothesis that behaviour drives evolution, they raise  
485 important questions about its underlying mechanisms. Specifically, there seems to be support  
486 that this association could be an effect of behavioural flexibility dampening extinction of young  
487 lineages, rather than accelerating diversification via splitting of behaviourally shifted  
488 individuals/populations as previously suggested (Wilson, 1985). If true, this would be  
489 informative in helping biologists anticipate how different organisms (i.e. flexible versus  
490 inflexible) might be expected to respond to external change (e.g. habitat modification) and, in  
491 turn, could allow biologists to better anticipate which species might be particularly vulnerable to  
492 extinction in a changing world.

493

494 ACKNOWLEDGEMENTS: This work was supported by McGill University, the Natural  
495 Sciences and Engineering Research Council of Canada (NSERC) Discovery Grants Program  
496 (SMR and AOM) and the Canada Foundation for Innovation (SMR). MJAC was supported by an  
497 NSERC-CREATE Biodiversity, Ecosystem Services, and Sustainability (BESS) award. We  
498 thank the Reader and Guigueno labs at McGill, Brian Leung, Hans Larsson, William Wcislo and  
499 the Crawford Lab for Evolutionary Studies at SFU for feedback on portions of the manuscript  
500 and study design.

501

502 Data and code will be made available through Dryad or a similar repository.



503 REFERENCES:

504 Anderson, R. W. (1995). Learning and evolution: A quantitative genetics approach. *Journal of*  
505 *Theoretical Biology*, 175: 89–101.

506 Ancel, L. W. (1999). A quantitative model of the Simpson–Baldwin effect. *Journal of*  
507 *Theoretical Biology*, 196: 197–209.

508 Ancel, L. W. (2000). Undermining the Baldwin expediting effect: does phenotypic plasticity  
509 accelerate evolution? *Theoretical Population Biology*, 58: 307–319.

510 Arbour, J. H., & Santana, S. E. (2017). A major shift in diversification rate helps explain  
511 macroevolutionary patterns in primate species diversity. *Evolution*, 71: 1600–1613.

512 Arnold, C., Matthews, L. J., & Nunn, C. L. (2010). The 10kTrees website: a new online resource  
513 for primate phylogeny. *Evolutionary Anthropology*, 19: 114–118.

514 Audet, J. N., & Lefebvre, L. (2017). What’s flexible in behavioural flexibility? *Behavioural*  
515 *Ecology*, 28: 943–947.

516 Badgley, C. (2010). Tectonics, topography, and mammalian diversity. *Ecography*, 33: 220–231.

517 Baldwin, J. M. (1902). *Development and evolution*. MacMillan, New York.

518 Barton, R. A. (2012). Embodied cognitive evolution and the cerebellum. *Philosophical*  
519 *Transactions of the Royal Society B: Biological Sciences*, 367: 2097–2107.

520 Bateson, P. (1988). The active role of behaviour in evolution. In M. –W. Ho & S. W. Fox (Eds.),  
521 *Evolutionary processes and metaphors* (p. 191–207). John Wiley and Sons, Ltd., New York.

522 Behera, N., & Nanjundiah, V. (1995). An investigation into the role of phenotypic plasticity in  
523 evolution. *Journal of Theoretical Biology*, 172: 225–234.

- 524 Cardillo, M., Huxtable, J. S., & Bromham, L. (2003). Geographic range size, life history and  
525 rates of diversification in Australian mammals. *Journal of Evolutionary Biology*, 16: 282–  
526 288.
- 527 Charnov, E. L., & Berrigan, D. (1993). Why do female primates have such long lifespans and so  
528 few babies? Or life in the slow lane. *Evolutionary Anthropology*, 1: 191–194.
- 529 Darlington, R. B., & Smulders, T. V. (2001). Problems with residual analysis. *Animal*  
530 *Behaviour*, 62: 599–602.
- 531 DeCasien, A. R., & Higham, J. P. (2019). Primate mosaic brain evolution reflects selection on  
532 sensory and cognitive specialization. *Nature Ecology & Evolution*, 3: 1483–1493.
- 533 Ducatez, S., Clavel, J., & Lefebvre, L. (2015). Ecological generalism and behavioural  
534 innovation in birds: technical intelligence or the simple incorporation of new foods?  
535 *Journal of Animal Ecology*, 84: 79–89.
- 536 Ducatez, S., Sol, D., Sayol, F., & Lefebvre, L. (2020). Behavioural plasticity is associated  
537 with reduced extinction risk in birds. *Nature Ecology & Evolution*, 4: 788–793.
- 538 Duckworth, R. A. (2009). The role of behaviour in evolution: a search for mechanism.  
539 *Evolutionary Ecology*, 23: 513–531.
- 540 Dunbar, R. I., & Shultz, S. (2007). Understanding primate brain evolution. *Philosophical*  
541 *Transactions of the Royal Society B: Biological Sciences*, 362: 649–658.
- 542 Fontanillas, E., Welch, J. J., Thomas, J. A., & Bromham, L. (2007). The influence of body size  
543 and net diversification rate on molecular evolution during the radiation of animal phyla.  
544 *BMC Evolutionary Biology*, 7: 95.

- 545 Foote, A. D., Vijay, N., Ávila-Arcos, M. C., Baird, R. W., Durban, J. W., Fumagalli, M., ... &  
546 Wolf, J. B. W. (2016). Genome-culture coevolution promotes rapid divergence of killer  
547 whale ecotypes. *Nature Communications*, 7: 11693.
- 548 Freckleton, R. P. (2002). On the misuse of residuals in ecology: regression of residuals vs.  
549 multiple regression. *Journal of Animal Ecology*, 71: 542–545.
- 550 Freckleton, R. P., Harvey, P. H., & Pagel, M. (2002). Phylogenetic analysis and comparative  
551 data: a test and review of evidence. *The American Naturalist*, 160: 712–726.
- 552 Frey, M. A. (2010). The relative importance of geography and ecology in species diversification:  
553 evidence from a tropical marine intertidal snail (*Nerita*). *Journal of Biogeography*, 37: 1515–  
554 1528.
- 555 Futuyma, D. J. (1979). *Evolutionary biology*. Sinauer Associates, Sunderland.
- 556 Futuyma, D. J. (2010). Evolutionary constraint and ecological consequences. *Evolution*, 64:  
557 1865–1884.
- 558 Gelman, A. (2008). Scaling regression inputs by dividing by two standard deviations. *Statistics*  
559 *in Medicine*, 27: 2865–2873.
- 560 Gonzalez-Voyer, A., González-Suárez, M., Vilà, C., & Revilla, E. (2016). Larger brain size  
561 indirectly increases vulnerability to extinction in mammals. *Evolution*, 70: 1364–1375.
- 562 Groves, C. P. (2014). Primate taxonomy: inflation or real? *Annual Review of Anthropology*, 43:  
563 27–36.
- 564 Harmon, L. J., Weir, J. T., Brock, C. D., Glor, R. E., & Challenger, W. (2008). GEIGER:  
565 investigating evolutionary radiations. *Bioinformatics*, 24: 129–131.

- 566 Healy, S. D., & Rowe, C. (2007). A critique of comparative studies of brain size. *Proceedings of*  
567 *the Royal Society B: Biological Sciences*, 274: 453–464.
- 568 Heard, S. B., & Hauser, D. L. (1995). Key evolutionary innovations and their ecological  
569 mechanisms. *Historical Biology*, 10: 151–173.
- 570 Hinton, G. E., & Nowlan, S. J. (1987). How learning can guide evolution. *Complex Systems*, 1:  
571 495–502.
- 572 Honacki, J. H., Kinman, K. E., & Koeppl, J. W. (1982). *Mammal species of the world: a*  
573 *taxonomic and geographic reference*. Allen Press, Inc. and Association of Systematic  
574 Collections, Lawrence.
- 575 Huey, R. B., Hertz, P. E., & Sinervo, B. (2003). Behavioural drive versus behavioural inertia in  
576 evolution: a null model approach. *The American Naturalist*, 161: 357–366.
- 577 Isaac, N. J., Jones, K. E., Gittleman, J. L., & Purvis, A. (2005). Correlates of species richness in  
578 mammals: body size, life history, and ecology. *The American Naturalist*, 165: 600–607.
- 579 Isaac, N. J., Mallet, J., & Mace, G. M. (2004). Taxonomic inflation: its influence on  
580 macroecology and conservation. *Trends in Ecology & Evolution*, 19: 464–469.
- 581 IUCN/SSC Primate Specialist Group. (2018). Retrieved from [http://www.primate-](http://www.primatesg.org/red_list_threat_status/)  
582 [sg.org/red\\_list\\_threat\\_status/](http://www.primatesg.org/red_list_threat_status/) [accessed 10 November 2018].
- 583 Jetz, W., Thomas, G. H., Joy, J. B., Hartmann, K., & Mooers, A. O. (2012). The global diversity  
584 of birds in space and time. *Nature*, 491: 444–448.

- 585 Jones, K. E., Bielby, J., Cardillo, M., Fritz, S. A., O'Dell, J., Orme, C. D. L., ... & Connolly, C.  
586 (2009). PanTHERIA: a species-level database of life history, ecology, and geography of  
587 extant and recently extinct mammals: *Ecology*, 90: 2648–2648.
- 588 Keverne, E. B., Martel, F. L., & Nevison, C. M. (1996). Primate brain evolution: genetic and  
589 functional considerations. *Proceedings of the Royal Society B: Biological Sciences*, 263:  
590 689–696.
- 591 Kozak, K. H., & Wiens, J. J. (2010). Accelerated rates of climatic-niche evolution underlie rapid  
592 species diversification. *Ecology Letters*, 13: 1378–1389.
- 593 Lachlan, R. F., & Servedio, M. R. (2004). Song learning accelerates allopatric speciation.  
594 *Evolution*, 58: 2049–2063.
- 595 Laland, K. N., & Reader, S. M. (1999). Foraging innovation in the guppy. *Animal Behaviour*,  
596 57: 331–340.
- 597 Lapedra, O., Sol, D., Carranza, S., & Beaulieu, J. M. (2013). Behavioural changes and the  
598 adaptive diversification of pigeons and doves. *Proceedings of the Royal Society B:*  
599 *Biological Sciences*, 280: 20122893.
- 600 Lefebvre, L., Reader, S. M., & Sol, D. (2004). Brains, innovations and evolution in birds and  
601 primates. *Brain, Behaviour and Evolution*, 63: 233–246.
- 602 Lefebvre, L., Whittle, P., Lascaris, E., & Finkelstein, A. (1997). Feeding innovations and  
603 forebrain size in birds. *Animal Behaviour*, 53: 549–560.
- 604 Lewis, P. O. (2001). A likelihood approach to estimating phylogeny from discrete morphological  
605 character data. *Systematic Biology*, 50: 913–925.

- 606 Lewontin, R. C. (1983). Gene, organism and environment. In D. S. Bendall (Eds.), *Evolution*  
607 from molecules to men (p. 273–285). Cambridge University Press, New York.
- 608 Logan, C. J., Avin, S., Boogert, N., Buskell, A., Cross, F. R., Currie, A., ... & Montgomery, S.  
609 H. (2018). Beyond brain size: Uncovering the neural correlates of behavioural and cognitive  
610 specialization. *Comparative Cognition & Behaviour Reviews*, 13: 55–89.
- 611 Losos, J. B., Schoener, T. W., & Spiller, D. A. (2004). Predator-induced behaviour shifts and  
612 natural selection in field-experimental lizard populations. *Nature*, 432: 505–508.
- 613 Magallon, S., & Sanderson, M. J. (2001). Absolute diversification rates in angiosperm clades.  
614 *Evolution*, 55: 1762–1780.
- 615 Masters, J. C., Génin, F., Couette, S., Groves, C. P., Nash, S. D., Delpero, M., & Pozzi, L.  
616 (2017). A new genus for the eastern dwarf galagos (Primates: Galagidae). *Zoological*  
617 *Journal of the Linnean Society*, 181: 229–241.
- 618 Mayr, E. (1963). *Animal species and evolution*. Belknap Press, Cambridge.
- 619 Mikhalevich, I., Powell, R., & Logan, C. (2017). Is behavioural flexibility evidence of  
620 cognitive complexity? How evolution can inform comparative cognition. *Interface*  
621 *Focus*, 7: 20160121.
- 622 Mitchell, J. S., & Rabosky, D. L. (2017). Bayesian model selection with BAMM: effects of  
623 the model prior on the inferred number of diversification shifts. *Methods in Ecology*  
624 *and Evolution*, 8: 37–46.
- 625 Muñoz, M. M., & Losos, J. B. (2018). Thermoregulatory behaviour simultaneously promotes and  
626 forestalls evolution in a tropical lizard. *The American Naturalist*, 191: E15–E26.

- 627 Navarrete, A. F., Blezer, E. L., Pagnotta, M., de Viet, E. S., Todorov, O. S., Lindenfors, P., ...  
628 & Reader, S. M. (2018). Primate brain anatomy: new volumetric MRI measurements  
629 for neuroanatomical studies (with Erratum). *Brain, Behaviour and Evolution*, 91: 109–  
630 117.
- 631 Navarrete, A. F., Reader, S. M., Street, S. E., Whalen, A., & Laland, K. N. (2016). The  
632 coevolution of innovation and technical intelligence in primates. *Philosophical  
633 Transactions of the Royal Society B: Biological Sciences*, 371: 20150186.
- 634 Nicolakakis, N., Lefebvre, L. & Sol, D. (2003). Behavioural flexibility predicts species  
635 richness in birds, but not extinction risk. *Animal Behaviour*, 65: 445–452.
- 636 Odling-Smee, F. J., Laland, K. N., & Feldman, M. W. (2003). *Niche construction: the  
637 neglected process in evolution*. Princeton University Press, Princeton.
- 638 Overington, S. E., Morand-Ferron, J., Boogert, N. J., & Lefebvre, L. (2009). Technical  
639 innovations drive the relationship between innovativeness and residual brain size in  
640 birds. *Animal Behaviour*, 78: 1001–1010.
- 641 Paradis, E. (2005). Statistical analysis of diversification with species traits. *Evolution*, 59: 1–  
642 12.
- 643 Pelletier, F., Garant, D., & Hendry, A. P. (2009). Eco-evolutionary dynamics. *Philosophical  
644 Transactions of the Royal Society B: Biological Sciences*, 364: 1483–1489.
- 645 Powell, L. E., Isler, K., & Barton, R. A. (2017). Re-evaluating the link between brain size and  
646 behavioural ecology in primates. *Proceedings of the Royal Society B: Biological  
647 Sciences*, 284: 20171765.

- 648 Price, T. D., Qvarnström, A., & Irwin, D. E. (2003). The role of phenotypic plasticity in  
649 driving genetic evolution. *Proceedings of the Royal Society B: Biological Sciences*,  
650 270: 1433–1440.
- 651 Purvis, A., Webster, A. J., Agapow, P. M., Jones, K. E., & Isaac, N. J. (2003). Primate life  
652 histories and phylogeny. In P. M. Kappeler & M. E. Pereira (Eds.), *Primate life*  
653 *histories and socioecology* (p. 25–40). University of Chicago Press, Chicago.
- 654 R Core Team. (2020). R: A Language and environment for statistical computing. R  
655 Foundation for Statistical Computing, Vienna, Austria. <http://www.R-project.org/>
- 656 Rabosky, D. L. (2009). Ecological limits and diversification rate: alternative paradigms to  
657 explain the variation in species richness among clades and regions. *Ecology Letters*,  
658 12: 735–743.
- 659 Raikow, R. J. (1986). Why are there so many kinds of passerine birds? *Systematic Zoology*,  
660 35: 255–259.
- 661 Reader, S. M. (2003). Innovation and social learning: individual variation and brain evolution.  
662 *Animal Biology*, 53: 147–158.
- 663 Reader, S. M., & Biro, D. (2010). Experimental identification of social learning in wild  
664 animals. *Learning & Behaviour*, 38: 265–283.
- 665 Reader, S. M., Hager, Y., & Laland, K. N. (2011). The evolution of primate general and  
666 cultural intelligence. *Philosophical Transactions of the Royal Society B*, 366: 1017–  
667 1027.



- 668 Reader, S. M., & Laland, K. N. (2002). Social intelligence, innovation, and enhanced brain  
669 size in primates. *Proceedings of the National Academy of Sciences*, 99: 4436–4441.
- 670 Reader, S. M., & MacDonald, K. (2003). Environmental variability and primate behavioural  
671 flexibility. In S. M. Reader & K. N. Laland (Eds.), *Animal innovation* (p. 83–116).  
672 Oxford University Press, Oxford.
- 673 Riesch, R., Barrett-Lennard, L. G., Ellis, G. M., Ford, J. K. B., & Deecke, V. B. (2012). Cultural  
674 traditions and the evolution of reproductive isolation: ecological speciation in killer whales?  
675 *Biological Journal of the Linnean Society*, 106: 1–17.
- 676 Rosenblum, E. B., Sarver, B. A., Brown, J. W., Des Roches, S., Hardwick, K. M., Hether, T. D.,  
677 ... & Harmon, L. J. (2012). Goldilocks meets Santa Rosalia: an ephemeral speciation model  
678 explains patterns of diversification across time scales. *Evolutionary Biology*, 39: 255–261.
- 679 Rossmannith, E., Grimm, V., Blaum, N., & Jeltsch, F. (2006). Behavioural flexibility in the  
680 mating system buffers population extinction: lessons from the lesser spotted woodpecker  
681 *Picoides minor*. *Journal of Animal Ecology*, 75: 540–548.
- 682 Rylands, A. B., & Mittermeier, R. A. (2014). Primate taxonomy: species and conservation.  
683 *Evolutionary Anthropology*, 23: 8–10.
- 684 Sayol, F., Lapiedra, O., Ducatez, S., & Sol, D. (2019). Larger brains spur species diversification  
685 in birds. *Evolution*, 73: 2085–2093.
- 686 Scott-Phillips, T. C., Laland, K. N., Shuker, D. M., Dickins, T. E., & West, S. A. (2014). The  
687 niche construction perspective. A critical appraisal. *Evolution*, 68: 1231–1243.

- 688 Shultz, S. B., Bradbury, R. L., Evans, K. D., Gregory, R., & Blackburn, T. M. (2005). Brain size  
689 and resource specialization predict long-term population trends in British birds. *Proceedings*  
690 *of the Royal Society B: Biological Sciences*, 272: 2305–2311.
- 691 Snell-Rood, E. (2013). An overview of the evolutionary causes and consequences of behavioural  
692 plasticity. *Animal Behaviour*, 85: 1004–1011.
- 693 Snell-Rood, E., Swanson, E., & Jaumann, S. (2015). Insects as a model system to understand the  
694 evolutionary implications of innovation. In A. B. Kaufman & J. C. Kaufman (Eds.), *Animal*  
695 *creativity and innovation* (p. 459–478). Academic Press, London.
- 696 Sol, D. (2003). Behavioural flexibility: a neglected issue in the ecological and evolutionary  
697 literature? In S. M. Reader & K. N. Laland (Eds.), *Animal innovation* (p. 63–82). Oxford  
698 University Press, Oxford.
- 699 Sol, D., & Lefebvre, L. (2000). Behavioural flexibility predicts invasion success in birds  
700 introduced to New Zealand. *Oikos*, 90: 599–605.
- 701 Sol, D., Stirling, D. G., & Lefebvre, L. (2005). Behavioural drive or behavioural inhibition in  
702 evolution: subspecific diversification in holarctic passerines. *Evolution*, 59: 2669–  
703 2677.
- 704 Sol, D., Székely, T., Liker, A., & Lefebvre, L. (2007). Big-brained birds survive better in  
705 nature. *Proceedings of the Royal Society B: Biological Sciences*, 274: 763–769.
- 706 Springer, M. S., Meredith, R. W., Gatesy, J., Emerling, C. A., Park, J., Rabosky, D. L., ... &  
707 Fisher, C. A. (2012). Macroevolutionary dynamics and historical biogeography of  
708 primate diversification inferred from a species supermatrix. *PLoS One*, 7: e49521.

- 709 Stadler, T. (2011). Mammalian phylogeny reveals recent diversification rate shifts.  
710 Proceedings of the National Academy of Sciences, 108: 6187–6192.
- 711 Stephan, H., Baron, G., & Frahm, H. (1988). Comparative size of brains and brain structures.  
712 In H. Steklis & J. Erwin (Eds.), *Comparative Primate Biology Vol. 4* (p. 1–38). Alan  
713 R. Liss, New York.
- 714 Stephan, H., Bauchot, R., & Andy, O. J. (1970). The allocortex in primates. In C. Noback &  
715 W. Montagna (Eds.), *The primate brain: Advances in primatology* (p. 289–297).  
716 Appleton-Century-Crofts, New York.
- 717 Stephan, H., Frahm, H., & Baron, G. (1981). New and revised data on volumes of brain  
718 structures in insectivores and primates. *Folia Primatologica*, 35: 1–29.
- 719 Street, S. E., Navarrete, A. F., Reader, S. M., & Laland, K. N. (2017). Coevolution of cultural  
720 intelligence, extended life history, sociality, and brain size in primates. *Proceedings of*  
721 *the National Academy of Sciences*, 114: 7908–7914.
- 722 Tattersall, I. (2007). Madagascar's lemurs: cryptic diversity or taxonomic inflation?  
723 *Evolutionary Anthropology*, 16: 12–23.
- 724 Tebbich, S., Sterelny, K., & Teschke, I. (2010). The tale of the finch: adaptive radiation and  
725 behavioural flexibility. *Philosophical Transactions of the Royal Society B: Biological*  
726 *Sciences*, 365: 1099–1109.
- 727 Thomas, J. A., Welch, J. J., Lanfear, R., & Bromham, L. (2010). A generation time effect on  
728 the rate of molecular evolution in invertebrates. *Molecular Biology and Evolution*, 27:  
729 1173–1180.

- 730 Upham, N., Esselstyn, J. A., & Jetz, W. (2019a). Ecological causes of uneven diversification  
731 and richness in the mammal tree of life (Preprint). bioRxiv, 504803.
- 732 Upham, N. S., Esselstyn, J. A., & Jetz, W. (2019b). Inferring the mammal tree: Species-level  
733 sets of phylogenies for questions in ecology, evolution, and conservation. *PLoS*  
734 *Biology*, 17: 1–44.
- 735 Vandervert, L. (2003). The neurophysiological basis of innovation. In L. Shavinina (Eds.),  
736 *The international handbook on innovation* (p. 17–30). Elsevier Science, Oxford.
- 737 Vandervert, L. R., Schimpf, P. H., & Liu, H. (2007). How working memory and the  
738 cerebellum collaborate to produce creativity and innovation. *Creativity Research*  
739 *Journal*, 19: 1–18.
- 740 Wcislo, W. T. (1989). Behavioural environments and evolutionary change. *Annual Review of*  
741 *Ecology and Systematics*, 20: 137–169.
- 742 Weber, E. U., Shafir, S., & Blais, A.-R. (2004). Predicting risk sensitivity in humans and lower  
743 animals: risk as variance or coefficient of variation. *Psychological Review*, 111: 430–445.
- 744 West-Eberhard, M. J. (1989). Phenotypic plasticity and the origins of diversity. *Annual review of*  
745 *Ecology and Systematics*, 20: 249–278.
- 746 West-Eberhard, M. J. (2003). *Developmental plasticity and evolution*. Oxford University  
747 Press, Oxford.
- 748 Wiens, J. J. (2017). What explains patterns of biodiversity across the Tree of Life? New  
749 research is revealing the causes of the dramatic variation in species numbers across  
750 branches of the Tree of Life. *BioEssays*, 39: 1600128.

- 751 Williams, C. B. (1964). Patterns in the balance of nature and related problems of quantitative  
752 ecology. Academic Press, London & New York.
- 753 Willis, J. C. (1922). Area and age: A study of geographical distribution and origin in species.  
754 Cambridge University Press, Cambridge.
- 755 Wilson, A. C. (1985). The molecular basis of evolution. *Scientific American*, 253: 164–173.
- 756 Wyles, J. S., Kunkel, J. G., & Wilson, A. C. (1983). Birds, behaviour, and anatomical  
757 evolution. *Proceedings of the National Academy of Sciences*, 80: 4394–4397.
- 758 Yeh, P. J. (2004). Rapid evolution of a sexually selected trait following population  
759 establishment in a novel habitat. *Evolution*, 58: 166–174.
- 760 Yeh, P. J., & Price, T. D. (2004). Adaptive phenotypic plasticity and the successful colonization  
761 of a novel environment. *The American Naturalist*, 164: 531–542.
